# Supplementary material
Source: PubMed Central journal article supplement (PMC7261087)
Supplement: pnas.1921015117.sapp.pdf [file pnas.1921015117.sapp.pdf]

Supplementary Information for

**The PDK1-Foxo1 signaling in adipocytes controls systemic insulin sensitivity through the 5-lipoxygenase- leukotriene B4 axis**

Tetsuya Hosooka,<sup>1,a</sup> Yusei Hosokawa,<sup>1,a</sup> Kaku Matsugi,<sup>1</sup> Masakazu Shinohara,<sup>2,3</sup> Yoko Senga,<sup>1</sup> Yoshikazu Tamori,<sup>1,4</sup> Chikako Aoki,<sup>1</sup> Sho Matsui,<sup>5</sup> Tsutomu Sasaki,<sup>5</sup> Tadahiro Kitamura,<sup>5</sup> Masashi Kuroda,<sup>6</sup> Hiroshi Sakaue,<sup>6</sup> Kazuhiro Nomura,<sup>1</sup> Kei Yoshino,<sup>1</sup> Yuko Nabatame,<sup>1</sup> Yoshito Itoh,<sup>7</sup> Kanji Yamaguchi,<sup>7</sup> Yoshitake Hayashi,<sup>8</sup> Jun Nakae,<sup>9</sup> Domenico Accilli,<sup>10</sup> Takehiko Yokomizo,<sup>11</sup> Susumu Seino,<sup>12</sup> Masato Kasuga<sup>13</sup> & Wataru Ogawa<sup>1</sup>

Corresponding author: Wataru Ogawa

Email: [ogawa@med.kobe-u.ac.jp](mailto:ogawa@med.kobe-u.ac.jp)

**This PDF file includes:**

Figures S1 to S9

Tables S1 to S3

**Fig. S1**

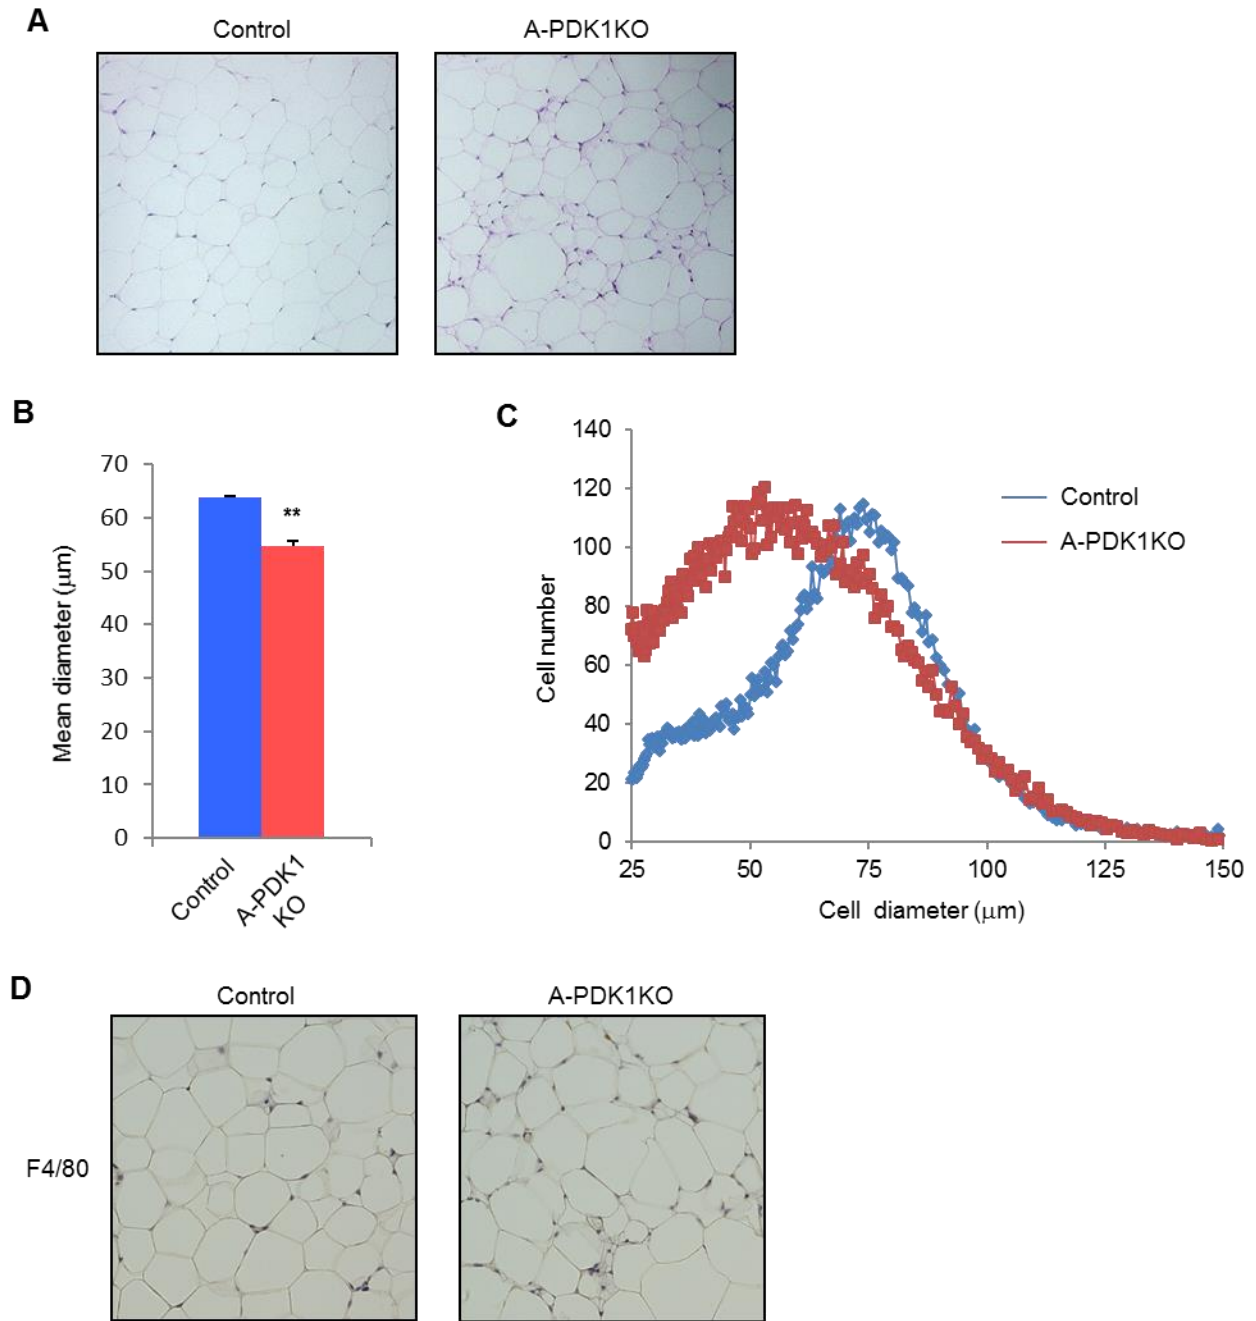

**Fig. S1.** Decreased adipocyte size in A-PDK1KO mice. (A) Hematoxylin-eosin staining of epididymal adipose tissue from control and A-PDK1KO mice. (B and C) Mean diameter of adipocytes (B) and distribution of adipocyte size (C) for epididymal adipose tissue from 20-week-old control or A-PDK1KO mice ( $n = 4$ ). Data in (B) are means  $\pm$  s.e.m. \*\* $P < 0.01$  versus control (Student's  $t$  test). (D) F4/80 immunohistochemistry of epididymal adipose tissue from control and A-PDK1KO mice.

**Fig. S2**

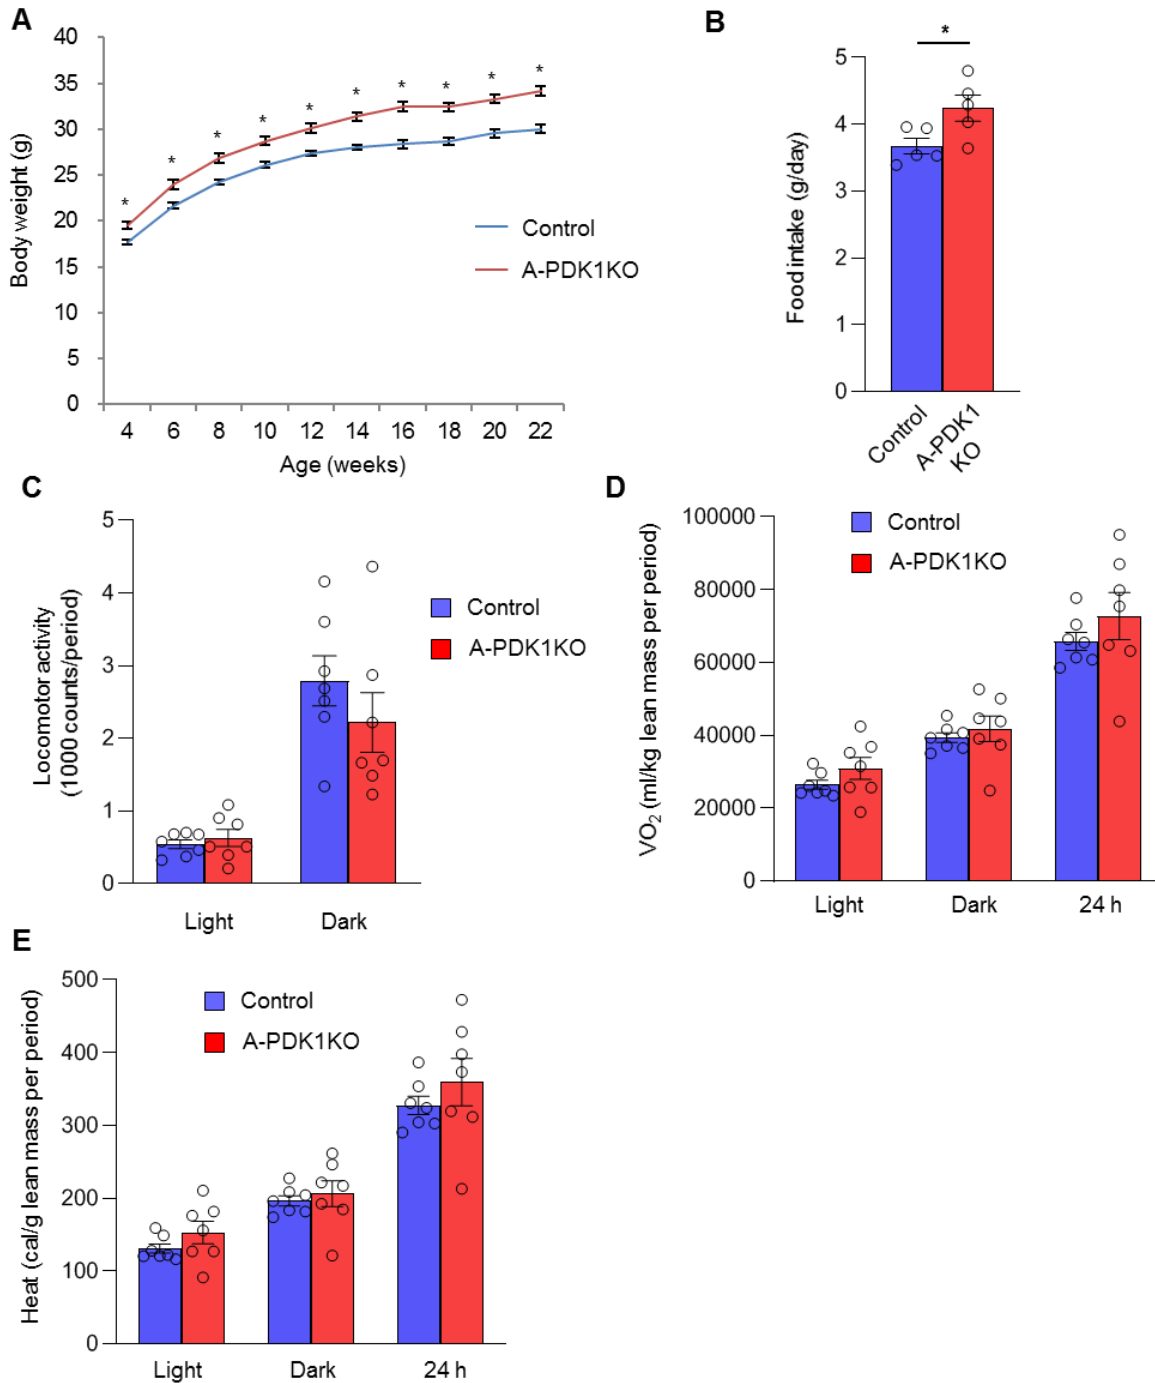

**Fig. S2.** Body weight, food intake, locomotor activity, and energy expenditure in A-PDK1KO mice. (A) Time course of body weight for control or A-PDK1KO mice ( $n = 7$  to  $10$ ). (B) Food intake for 15-week-old control or A-PDK1KO mice ( $n = 5$ ). (C-E) Locomotor activity (C), oxygen consumption ( $VO_2$ ) (D), and heat production (E) during light, dark, and 24-h periods for 14-week-old control or A-PDK1KO mice ( $n = 7$ ). All data are means  $\pm$  s.e.m. \* $P < 0.05$  versus corresponding control value (Student's  $t$  test).

**Fig. S3**

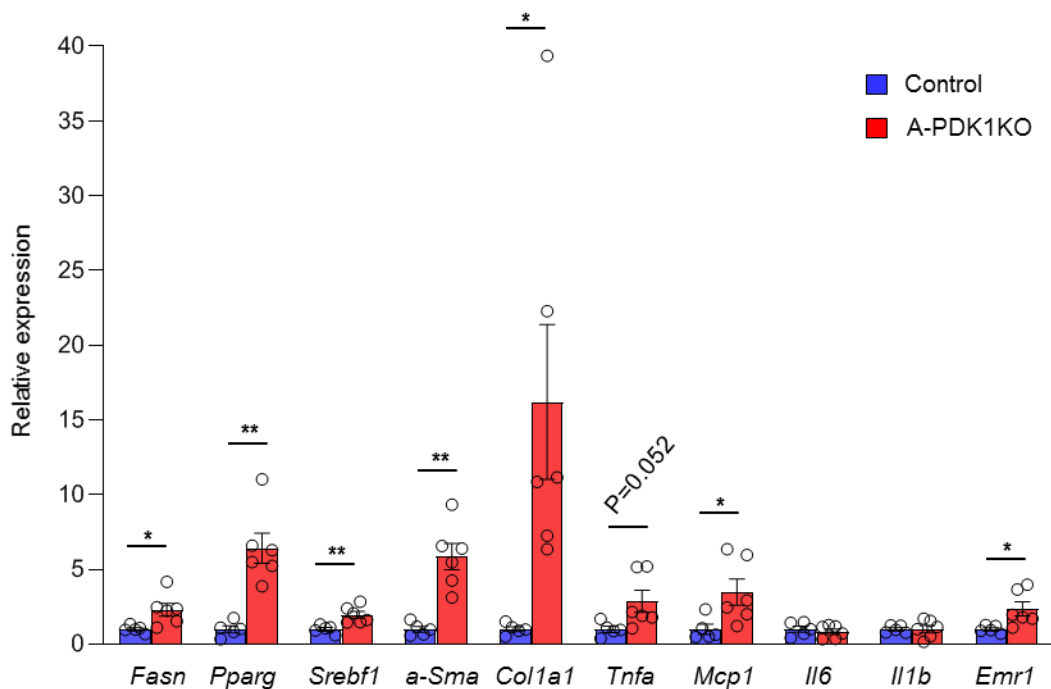

**Fig. S3.** Gene expression in the liver of A-PDK1KO mice. The abundance of mRNAs for genes related to lipogenesis, fibrosis, or inflammation in the liver of 37-week-old control or A-PDK1KO mice ( $n = 5-6$ ) was determined by Real-time PCR analysis. Data are means  $\pm$  s.e.m. \* $P < 0.05$ . \*\* $P < 0.01$  versus corresponding control value (Student's  $t$  test).

**Fig. S4**

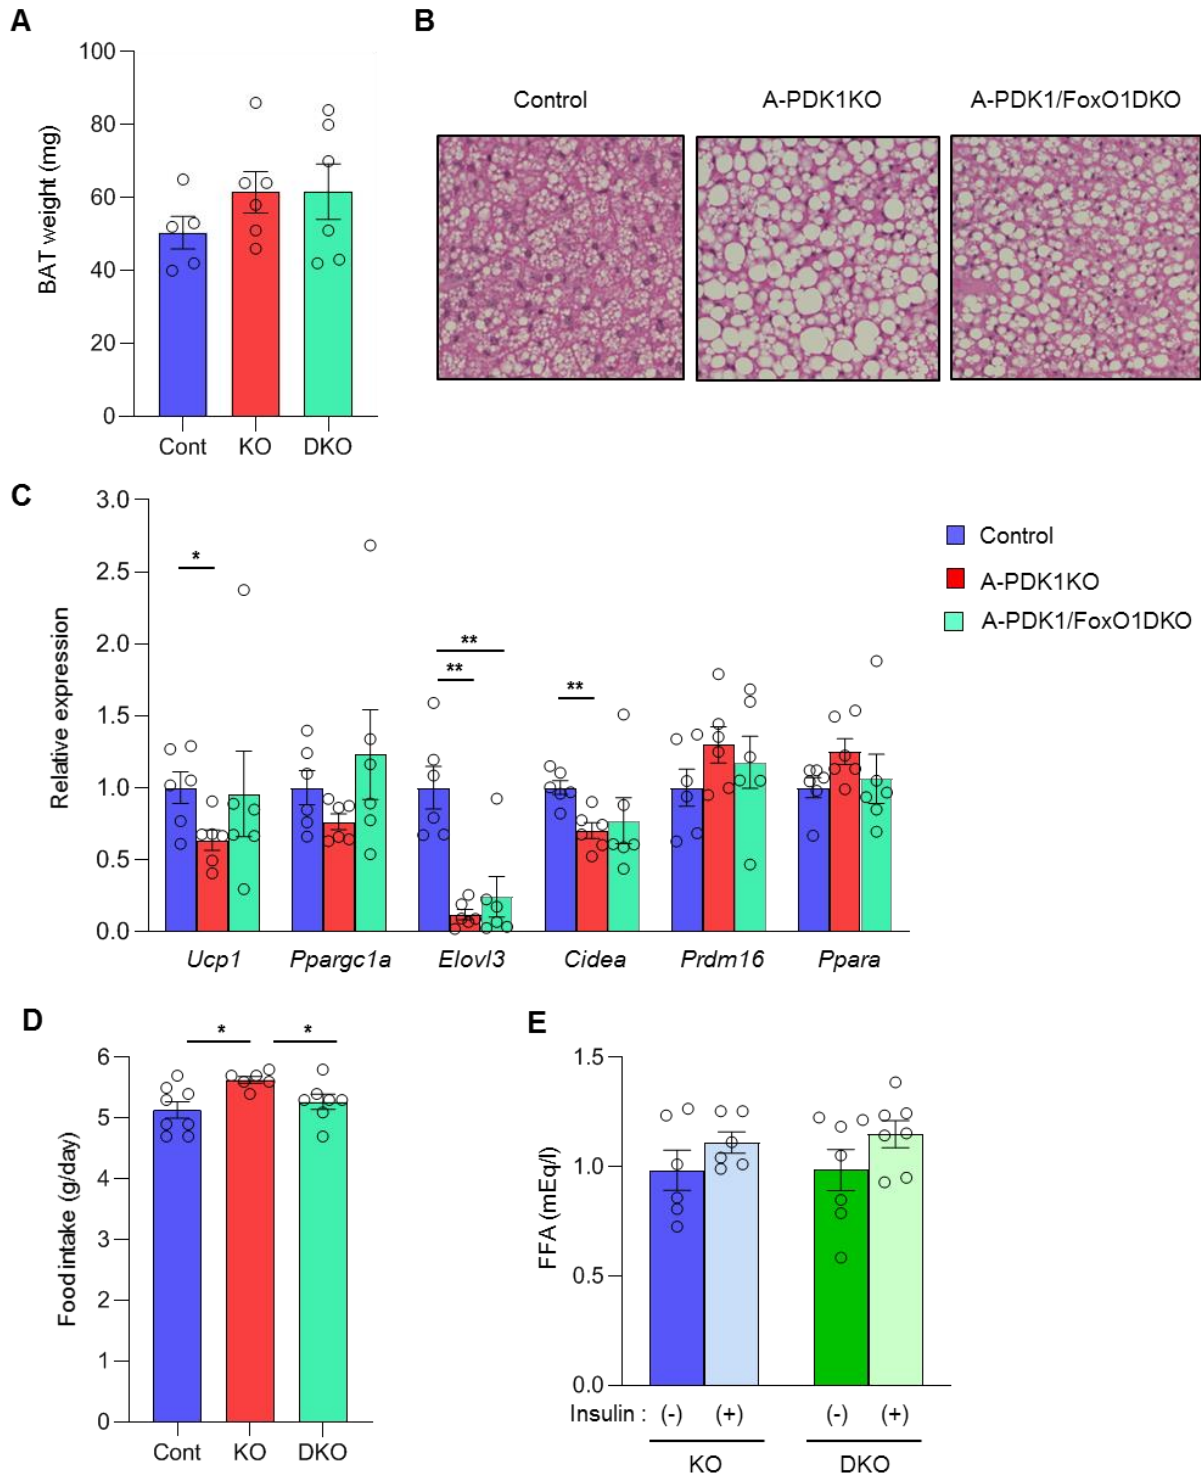

**Fig. S4.** BAT weight and histology, food intake, and lipolysis in A-PDK1KO and A-PDK1/FoxO1DKO mice. (A) BAT weight in control, A-PDK1KO, and A-PDK1/FoxO1DKO mice ( $n = 5$  or  $6$ ). (B) Hematoxylin-eosin staining of BAT from control, A-PDK1KO, and A-PDK1/FoxO1DKO mice. (C) Gene expression in BAT from control, A-PDK1KO, and A-PDK1/FoxO1DKO mice ( $n = 6$ ). (D) Food intake in control, A-PDK1KO, and A-

PDK1/FoxO1DKO mice ( $n = 6$  to  $8$ ) (E) Plasma FFA concentration in A-PDK1KO and A-PDK1/FoxO1DKO mice ( $n = 6$  or  $7$ ) measured 1 h after intraperitoneal injection of insulin (1 U/kg) or vehicle. All data are means  $\pm$  s.e.m. \* $P < 0.05$ . \*\* $P < 0.01$  versus corresponding control value (Student's t test).

**Fig. S5**

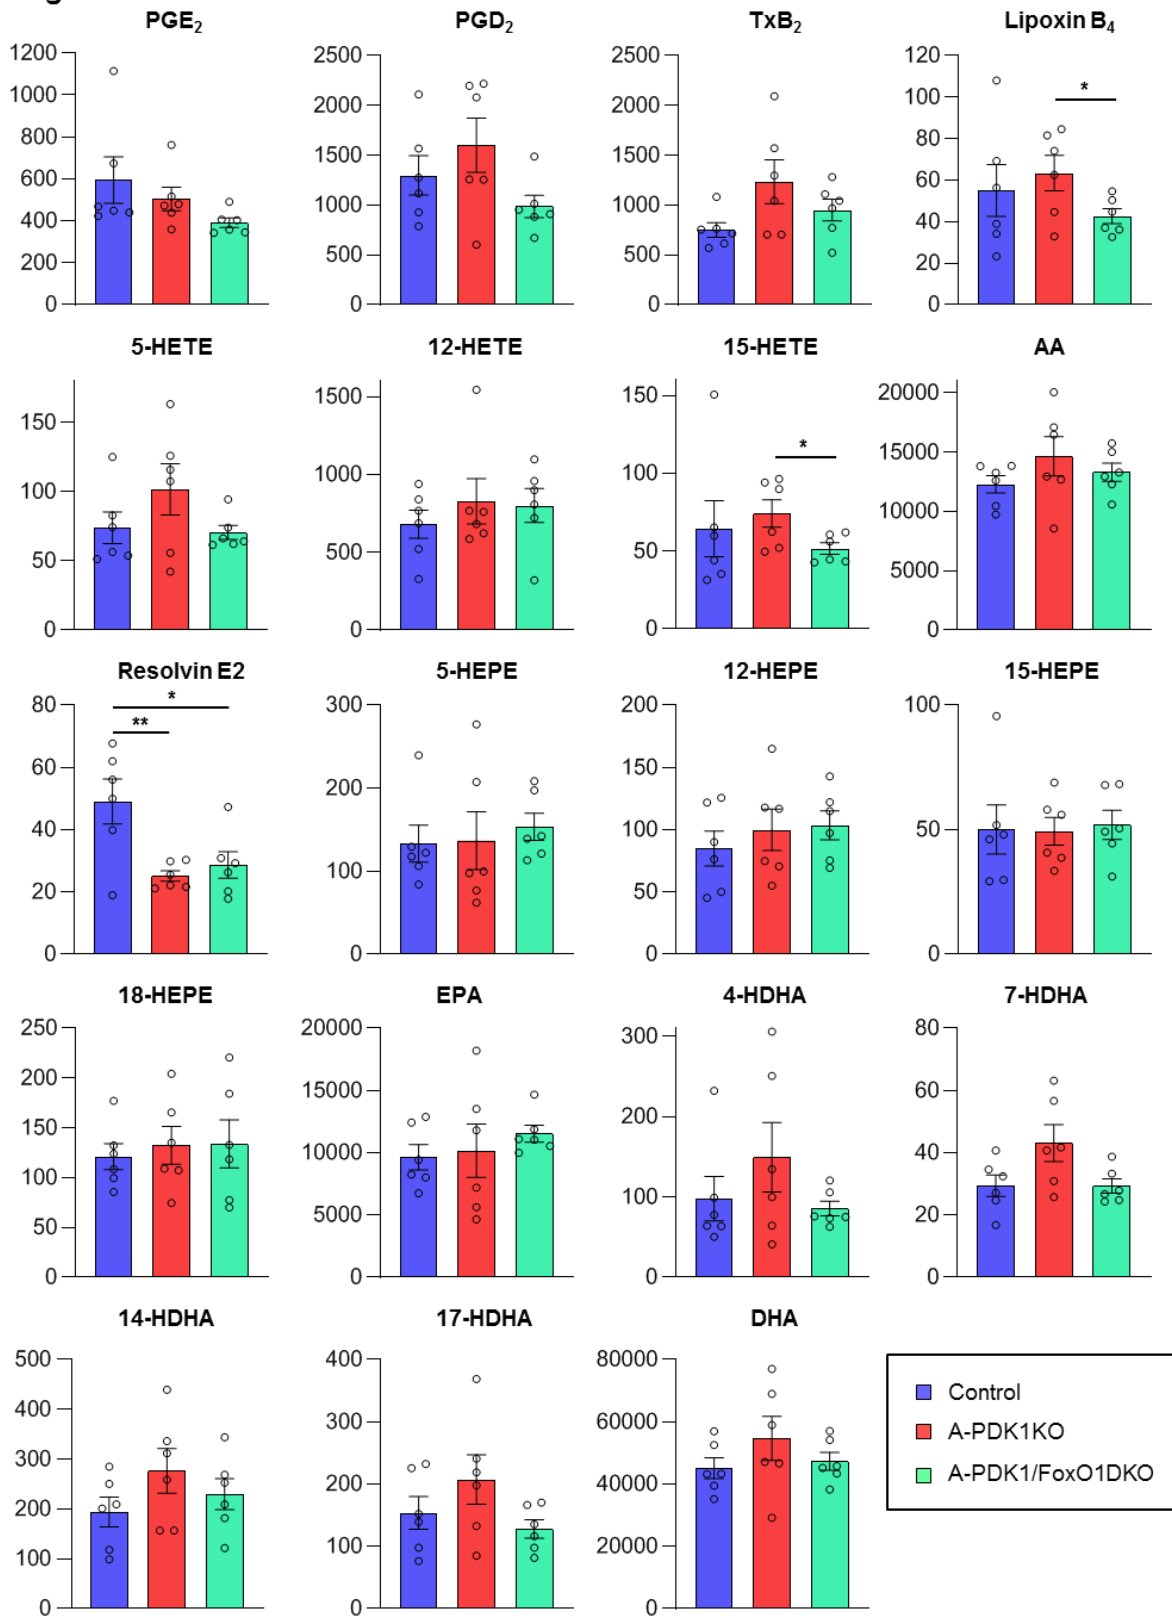

**Fig. S5.** Plasma concentrations of various lipid mediators in A-PDK1KO and A-PDK1/FoxO1DKO mice. The plasma concentrations of lipid mediators in 13-week-old control, A-PDK1KO, or A-PDK1/FoxO1DKO mice ( $n = 6$ ) were measured by LC-MS/MS analysis. All data are presented as picograms per milliliter and are means  $\pm$  s.e.m. \* $P < 0.05$ . \*\* $P < 0.01$  versus corresponding control value (Student's  $t$  test). PGE<sub>2</sub>, prostaglandin E<sub>2</sub>; PGD<sub>2</sub>, prostaglandin D<sub>2</sub>; TxB<sub>2</sub>, thromboxane B<sub>2</sub>; 5-HETE, 5-hydroxyeicosatetraenoic acid; 12-HETE, 12-hydroxyeicosatetraenoic acid; 15-HETE, 15-hydroxyeicosatetraenoic acid; AA, arachidonic acid; 5-HEPE, 5-hydroxyeicosapentaenoic acid; 12-HEPE, 12-hydroxyeicosapentaenoic acid; 15-HEPE, 15-hydroxyeicosapentaenoic acid; 18-HEPE, 18-hydroxyeicosapentaenoic acid; EPA, eicosapentaenoic acid; 4-HDHA, 4-hydroxydocosahexaenoic acid; 7-HDHA, 7-hydroxydocosahexaenoic acid; 14-HDHA, 14-hydroxydocosahexaenoic acid; 17-HDHA, 17-hydroxydocosahexaenoic acid; DHA, docosahexaenoic acid.



**Fig. S6**

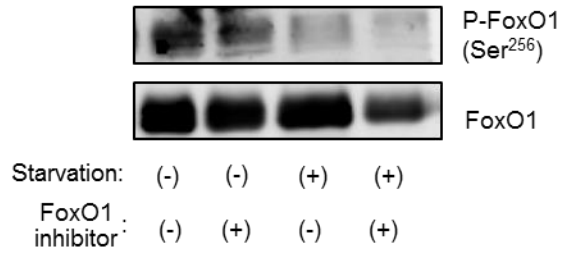

**Fig. S6.** Serum deprivation–induced down-regulation of FoxO1 phosphorylation in SV cells. SV cells isolated from C57BL/6 mice were exposed to AS1842856 (10  $\mu$ M) during serum deprivation for 24 h and were then subjected to immunoblot analysis of total and Ser<sup>256</sup>-phosphorylated forms of FoxO1.

**Fig. S7**

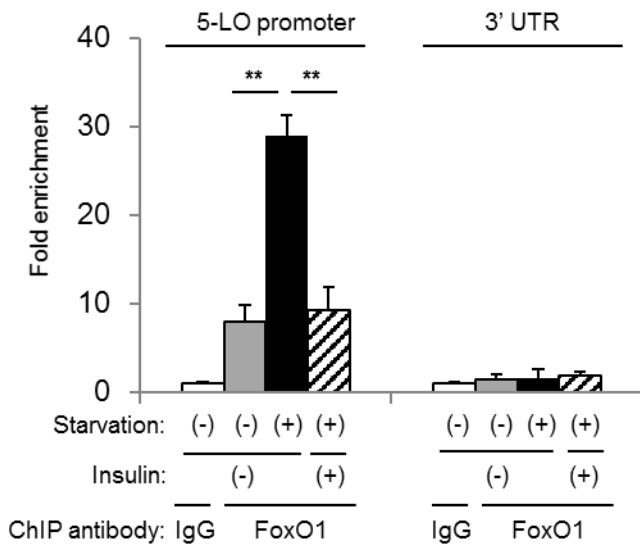

**Fig. S7.** FoxO1 binds to the 5-LO promoter in 3T3L1 adipocytes. ChIP analysis of FoxO1 binding to the 5-LO promoter in 3T3L1 adipocytes treated with (or without) insulin for 1 hour after serum starvation for 12 hours ( $n = 3$ ). Data are representative of three independent experiments. Data are means  $\pm$  s.e.m.  $**P < 0.01$  (Student's *t* test).

**Fig. S8**

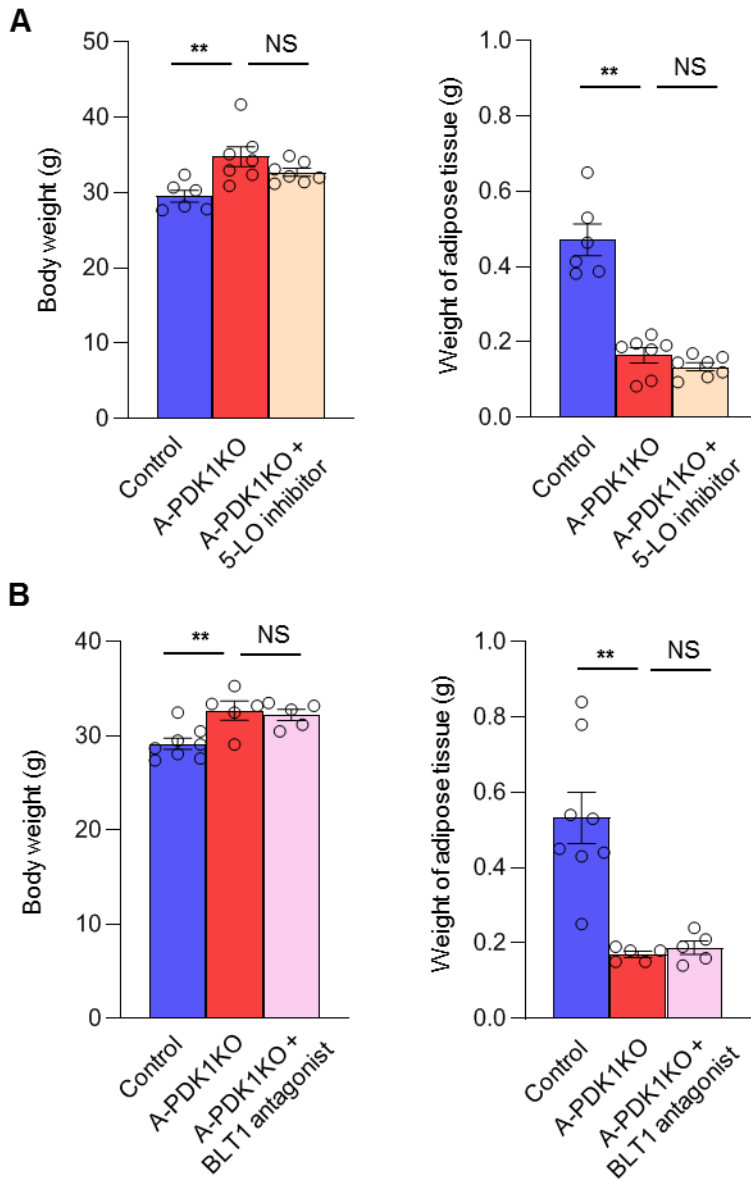

**Fig. S8.** Body and adipose tissue weight in A-PDK1KO mice treated with 5-LO inhibitor zileuton or BLT1 antagonist CP105696. (A) Body and adipose tissue weight in control or A-PDK1KO mice ( $n = 6$  or  $7$ ) treated (or not) with zileuton for 12 weeks. (B) Body and adipose tissue weight in control or A-PDK1KO mice ( $n = 5$  to  $8$ ) treated (or not) with CP105696 for 12 weeks. All data are means  $\pm$  s.e.m. \*\* $P < 0.01$  (Student's  $t$  test).

**Fig. S9**

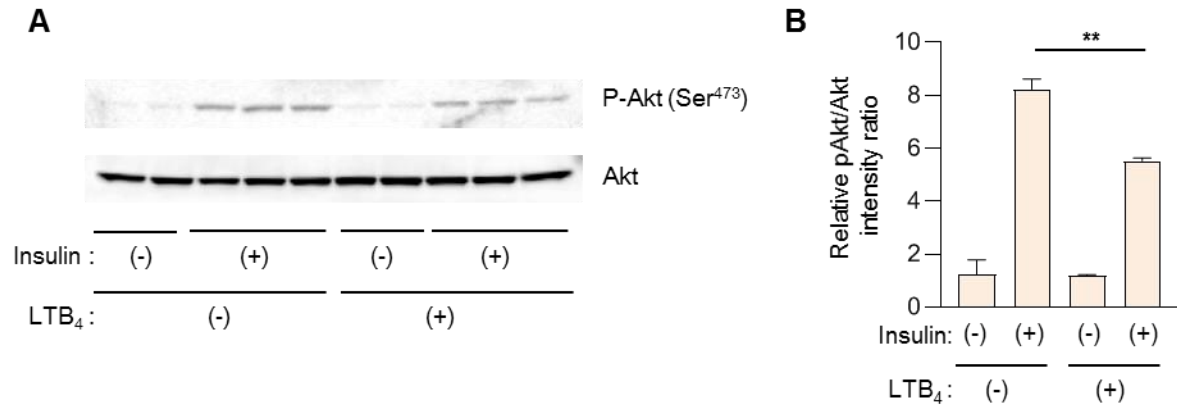

**Fig. S9.** LTB<sub>4</sub> suppresses insulin-dependent Akt phosphorylation in mouse primary hepatocytes. (A) Representative immunoblot of total and Ser473-phosphorylated forms of Akt in mouse primary hepatocytes stimulated with (or without) insulin after LTB<sub>4</sub> (100nM) or vehicle treatment for 1 hour. (B) Quantifications of experiments shown in panel (A). Data are representative of three independent experiments. Data are means  $\pm$  s.e.m. \*\*P < 0.01 (Student's t test).

**Table S1.** List of genes whose expression in epididymal adipose tissue was increased ( $\log_2(\text{KO/control ratio}) > 0.5$ ) in A-PDK1KO mice and normalized ( $\log_2(\text{DKO/control ratio}) < 0.2$ ) in A-PDK1/FoxO1DKO mice among genes with an expression signal of  $>30$  in control mice. Data for the 5-LO gene (*Alox5*) are shown in red.

| Gene symbol   | Gene accession     | Probe set ID | Control signal | KO signal | $\log_2(\text{KO/control})$ | DKO signal | $\log_2(\text{DKO/control})$ |
|---------------|--------------------|--------------|----------------|-----------|-----------------------------|------------|------------------------------|
| Rnu1b1        | NR_004412          | 17219206     | 100.6          | 166.9     | 0.73                        | 111.7      | 0.15                         |
| Ankrd23       | NM_153502          | 17222193     | 55.5           | 78.5      | 0.5                         | 60.4       | 0.12                         |
| Elf3          | NM_001163131       | 17227266     | 30.2           | 49.6      | 0.72                        | 31.5       | 0.06                         |
| Prg4          | NM_021400          | 17227892     | 88.5           | 185.2     | 1.07                        | 85.9       | -0.04                        |
| Akap12        | NM_031185          | 17231423     | 305.5          | 481.5     | 0.66                        | 318.1      | 0.06                         |
| Vnn1          | NM_011704          | 17232162     | 61.7           | 142.9     | 1.21                        | 37.3       | -0.72                        |
| Elane         | NM_015779          | 17235011     | 50.1           | 72.1      | 0.52                        | 54.9       | 0.13                         |
| 2210404O07Rik | ENSMUST00000105322 | 17235730     | 30.2           | 53.6      | 0.83                        | 29.1       | -0.05                        |
| Eid3          | NM_025499          | 17235937     | 30.8           | 63.8      | 1.05                        | 33.2       | 0.11                         |
| Rdh16         | NM_009040          | 17238172     | 57.3           | 90.3      | 0.66                        | 48.2       | -0.25                        |
| Syne1         | ENSMUST00000056571 | 17238904     | 38.9           | 60.1      | 0.63                        | 44.2       | 0.18                         |
| Syne1         | ENSMUST00000056571 | 17238930     | 72.5           | 111.1     | 0.62                        | 83.2       | 0.2                          |
| Col18a1       | NM_009929          | 17242232     | 83.4           | 125.1     | 0.59                        | 91.8       | 0.14                         |
| Zip781        | NM_199062          | 17243460     | 76.1           | 112.1     | 0.56                        | 55.8       | -0.45                        |
| 3230401D17Rik | ENSMUST00000104954 | 17249700     | 40             | 57.3      | 0.52                        | 43.9       | 0.14                         |
| Lrrc48        | ENSMUST00000108723 | 17250344     | 32.7           | 60.5      | 0.89                        | 35.6       | 0.12                         |
| Adap2         | ENSMUST00000021050 | 17253885     | 406.2          | 742.4     | 0.87                        | 354.7      | -0.2                         |
| Gngt2         | ENSMUST00000036088 | 17255466     | 30.2           | 44.7      | 0.57                        | 31         | 0.04                         |
| Spns2         | NM_153060          | 17265672     | 174.5          | 248.4     | 0.51                        | 189        | 0.11                         |
| Recql5        | NM_130454          | 17272047     | 40.7           | 68.3      | 0.75                        | 44         | 0.11                         |
| Mia2          | NM_177321          | 17275718     | 42.7           | 83.8      | 0.97                        | 47.5       | 0.16                         |
| Irf4          | ENSMUST00000021784 | 17286295     | 82.3           | 140.5     | 0.77                        | 68.9       | -0.26                        |
| Gcnt2         | NM_008105          | 17286707     | 121.3          | 200.4     | 0.72                        | 127        | 0.07                         |
| Ankrd32       | NM_134071          | 17294518     | 57             | 83.1      | 0.54                        | 65.2       | 0.19                         |
| Selk          | NM_019979          | 17298131     | 53.4           | 92.5      | 0.79                        | 52         | -0.04                        |
| Anxa8         | NM_013473          | 17298775     | 66.8           | 101.7     | 0.61                        | 56.6       | -0.24                        |
| AY358078      | AY358078           | 17299627     | 54.1           | 79.6      | 0.56                        | 44         | -0.3                         |
| 1700047G03Rik | NR_040447          | 17310400     | 62.1           | 104.4     | 0.75                        | 43.3       | -0.52                        |
| Dnajc22       | ENSMUST00000061295 | 17314729     | 33.1           | 46.9      | 0.5                         | 34.2       | 0.05                         |
| Krt18         | NM_010664          | 17315245     | 77.8           | 132       | 0.76                        | 87.9       | 0.18                         |
| Egflam        | NM_178748          | 17315763     | 54.2           | 79        | 0.54                        | 51.8       | -0.07                        |
| Kcnj15        | ENSMUST00000113862 | 17327450     | 54.6           | 78.4      | 0.52                        | 46.2       | -0.24                        |
| Prm2          | NM_008933          | 17328113     | 143.2          | 645.2     | 2.17                        | 99.2       | -0.53                        |
| Prm1          | ENSMUST00000023144 | 17328118     | 35.6           | 79.8      | 1.16                        | 31.8       | -0.17                        |
| Ube2v2        | NM_023585          | 17328425     | 46.1           | 72.4      | 0.65                        | 52.8       | 0.2                          |
| Apod          | NM_007470          | 17329759     | 195.4          | 276.4     | 0.5                         | 183.8      | -0.09                        |
| Gm609         | NM_001005854       | 17330636     | 36.7           | 63        | 0.78                        | 40.4       | 0.14                         |
| Pvrl3         | NM_021495          | 17330773     | 43             | 61.2      | 0.51                        | 47         | 0.13                         |
| Tmem45a       | NM_019631          | 17331078     | 31.8           | 46.3      | 0.54                        | 33.3       | 0.06                         |
| Cdkn1a        | NM_007669          | 17335467     | 287.5          | 413.6     | 0.52                        | 330.2      | 0.2                          |
| Gm16519       | ENSMUST00000092011 | 17339390     | 70.8           | 122.1     | 0.79                        | 75.3       | 0.09                         |
| Vit           | NM_028813          | 17339824     | 66.6           | 98        | 0.56                        | 63.7       | -0.06                        |
| Thbs2         | NM_011581          | 17341080     | 178.3          | 477.7     | 1.42                        | 86.1       | -1.05                        |
| Tcp11         | NM_013687          | 17342810     | 30.4           | 51        | 0.74                        | 29.1       | -0.07                        |
| Plk7          | NM_175168          | 17345475     | 33.4           | 49.3      | 0.56                        | 37.6       | 0.17                         |
| Tgif1         | NM_001164075       | 17346936     | 42             | 63.6      | 0.6                         | 45.1       | 0.1                          |
| Ankrd29       | NM_001190371       | 17352763     | 105.4          | 156.9     | 0.57                        | 102.9      | -0.04                        |
| Ak3           | NM_021299          | 17358498     | 35.4           | 51        | 0.53                        | 35.8       | 0.01                         |
| BC021614      | NM_144869          | 17361090     | 31.6           | 46.7      | 0.56                        | 25.4       | -0.32                        |
| Ms4a14        | XM_357051          | 17362941     | 32.9           | 54.1      | 0.72                        | 22.2       | -0.56                        |
| Sic16a12      | ENSMUST00000009522 | 17364139     | 107.4          | 180.2     | 0.75                        | 101        | -0.09                        |
| Gca           | NM_145523          | 17371201     | 102.4          | 150.7     | 0.56                        | 101.8      | -0.01                        |
| Thbs1         | NM_011580          | 17374488     | 202.7          | 461.3     | 1.19                        | 170.3      | -0.25                        |
| Optn          | ENSMUST00000114996 | 17381330     | 110.9          | 201.4     | 0.86                        | 116.8      | 0.07                         |
| 1700026L06Rik | NM_027283          | 17383423     | 37.2           | 54        | 0.54                        | 38.4       | 0.04                         |
| Fibin         | NM_026271          | 17389157     | 34             | 53.4      | 0.65                        | 36.3       | 0.09                         |
| Rnu1b1        | NR_004412          | 17400568     | 100.6          | 166.9     | 0.73                        | 111.7      | 0.15                         |
| Rnu1b1        | NR_004412          | 17400579     | 100.6          | 166.9     | 0.73                        | 111.7      | 0.15                         |
| Rnu1b1        | NR_004412          | 17400588     | 100.6          | 166.9     | 0.73                        | 111.7      | 0.15                         |
| Rnu1b1        | NR_004412          | 17400590     | 100.6          | 166.9     | 0.73                        | 111.7      | 0.15                         |

**Table S1-continued.**

| Gene symbol   | Gene accession     | Probe set ID    | Control signal | KO signal   | Log <sub>2</sub> (KO/control) | DKO signal  | Log <sub>2</sub> (DKO/control) |
|---------------|--------------------|-----------------|----------------|-------------|-------------------------------|-------------|--------------------------------|
| Lef1          | ENSMUST00000029611 | 17402662        | 36.9           | 59          | 0.68                          | 35.9        | -0.04                          |
| Cetn4         | NM_145825          | 17404896        | 35             | 56.1        | 0.68                          | 33.3        | -0.07                          |
| Il6ra         | NM_010559          | 17407138        | 392.1          | 619.4       | 0.66                          | 370.5       | -0.08                          |
| Rnu1b1        | NR_004412          | 17408038        | 100.6          | 166.9       | 0.73                          | 111.7       | 0.15                           |
| Rnu1b1        | NR_004412          | 17408063        | 100.6          | 166.9       | 0.73                          | 111.7       | 0.15                           |
| Rnu1b1        | NR_004412          | 17408065        | 100.6          | 166.9       | 0.73                          | 111.7       | 0.15                           |
| Synpo2        | NM_080451          | 17410031        | 74.1           | 114.1       | 0.62                          | 83.3        | 0.17                           |
| Acer2         | NM_139306          | 17415219        | 154.2          | 297.9       | 0.95                          | 147.2       | -0.07                          |
| Inadl         | NM_172696          | 17415635        | 31.6           | 46.1        | 0.54                          | 32.9        | 0.06                           |
| Tic39a        | NM_001145948       | 17416862        | 37.6           | 53.4        | 0.51                          | 41.9        | 0.15                           |
| Cldn19        | NM_153105          | 17417898        | 31.9           | 51.7        | 0.7                           | 35.1        | 0.14                           |
| Snord99       | NR_028537          | 17419411        | 501.8          | 756.9       | 0.59                          | 550.9       | 0.13                           |
| Hspg2         | NM_008305          | 17420171        | 755.4          | 1125.8      | 0.58                          | 814.5       | 0.11                           |
| Pla2g2d       | NM_011109          | 17420530        | 154.8          | 332.7       | 1.1                           | 167.7       | 0.12                           |
| Plekhf2       | NM_175175          | 17423209        | 69.4           | 151.6       | 1.13                          | 77.7        | 0.16                           |
| Rnu1b1        | NR_004412          | 17425278        | 100.6          | 166.9       | 0.73                          | 111.7       | 0.15                           |
| Cyp2j13       | NM_145548          | 17427331        | 31.5           | 49.6        | 0.66                          | 27.5        | -0.2                           |
| Fam159a       | NM_001099303       | 17428050        | 40             | 62.7        | 0.65                          | 43.5        | 0.12                           |
| Nasp          | NM_016777          | 17428659        | 46             | 67.6        | 0.55                          | 49.6        | 0.11                           |
| Med18         | NM_026039          | 17430853        | 30.9           | 48.1        | 0.64                          | 31.7        | 0.04                           |
| Shroom3       | NM_015756          | 17439138        | 45.8           | 67.5        | 0.56                          | 51.9        | 0.18                           |
| Bmp3          | NM_173404          | 17439535        | 85.5           | 142.1       | 0.73                          | 93.5        | 0.13                           |
| Wdr66         | BC138176           | 17442237        | 41.9           | 63.8        | 0.61                          | 47.9        | 0.19                           |
| Fam20c        | ENSMUST00000026972 | 17443901        | 96.4           | 156.5       | 0.7                           | 98.6        | 0.03                           |
| Gm9899        | NR_040427          | 17446752        | 34.6           | 50.8        | 0.55                          | 37.9        | 0.13                           |
| Pdk4          | NM_013743          | 17464654        | 287.5          | 490.8       | 0.77                          | 307.5       | 0.1                            |
| Gprn3         | ENSMUST00000051065 | 17467232        | 65.6           | 140.6       | 1.1                           | 48.9        | -0.42                          |
| Oxtr          | ENSMUST00000165435 | 17469627        | 124.9          | 306.9       | 1.3                           | 118.3       | -0.08                          |
| <b>Alox5</b>  | <b>NM_009662</b>   | <b>17470031</b> | <b>46.8</b>    | <b>69.2</b> | <b>0.56</b>                   | <b>52.1</b> | <b>0.15</b>                    |
| 4931406P16Rik | BC060233           | 17476690        | 35.1           | 51.9        | 0.57                          | 38.4        | 0.13                           |
| Stard10       | ENSMUST00000163799 | 17480813        | 214.7          | 327.2       | 0.61                          | 198.3       | -0.11                          |
| Acsn3         | NM_016870          | 17482310        | 160.9          | 308.3       | 0.94                          | 103.9       | -0.63                          |
| Olf310        | NM_001011520       | 17493116        | 48             | 68.9        | 0.52                          | 46          | -0.06                          |
| Defa3         | NM_007850          | 17499757        | 35.4           | 55.4        | 0.65                          | 37.9        | 0.1                            |
| Gse1          | NM_198671          | 17506249        | 63             | 90.9        | 0.53                          | 70.9        | 0.17                           |
| Ier2          | NM_010499          | 17511130        | 33.3           | 47.7        | 0.52                          | 32.7        | -0.03                          |
| Ccdc153       | NM_001081369       | 17516538        | 89.2           | 173.9       | 0.96                          | 98          | 0.14                           |
| Lctf          | NM_145835          | 17518278        | 40             | 60.3        | 0.59                          | 35.5        | -0.17                          |
| Elmod1        | NM_177769          | 17527173        | 56.1           | 105.2       | 0.91                          | 63          | 0.17                           |
| Morf41        | NM_001039147       | 17529647        | 68.3           | 99          | 0.54                          | 60.1        | -0.18                          |
| Zbtb38        | ENSMUST00000152594 | 17529855        | 106.3          | 165.5       | 0.64                          | 119.2       | 0.17                           |
| Gm14484       | ENSMUST00000164729 | 17533307        | 34.7           | 51.5        | 0.57                          | 39.1        | 0.17                           |
| Fmr1          | NM_008031          | 17535208        | 600.3          | 929.1       | 0.63                          | 528.6       | -0.18                          |
| 1700011M02Rik | NM_001243285       | 17536945        | 57.7           | 83.5        | 0.53                          | 51.3        | -0.17                          |
| A730046J19Rik | NR_040271          | 17538350        | 33.4           | 50.3        | 0.59                          | 34.6        | 0.05                           |
| G530011O06Rik | NR_029457          | 17546212        | 43.8           | 88.1        | 1.01                          | 48.3        | 0.14                           |

**Table S2.** List of genes whose expression in epididymal adipose tissue was decreased ( $\log_2(\text{KO}/\text{control ratio}) < -0.5$ ) in A-PDK1KO mice and normalized ( $\log_2(\text{DKO}/\text{control ratio}) > -0.2$ ) in A-PDK1/FoxO1DKO mice among genes with an expression signal of  $>30$  in control mice.

| Gene symbol   | Gene accession     | Probe set ID | Control signal | KO signal | $\log_2(\text{KO}/\text{control})$ | DKO signal | $\log_2(\text{DKO}/\text{control})$ |
|---------------|--------------------|--------------|----------------|-----------|------------------------------------|------------|-------------------------------------|
| Irs1          | NM_010570          | 17214753     | 33.6           | 21.3      | -0.66                              | 43.5       | 0.37                                |
| Gm5258        | XM_357111          | 17215101     | 34             | 24        | -0.5                               | 40.4       | 0.25                                |
| Mir3962       | NR_039539          | 17221010     | 40.5           | 27.4      | -0.57                              | 44.5       | 0.13                                |
| Abcb6         | ENSMUST00000027396 | 17224476     | 101.9          | 71.7      | -0.51                              | 101        | -0.01                               |
| BC035947      | BC138135           | 17224724     | 69.1           | 32.8      | -1.08                              | 104.3      | 0.59                                |
| Mndal         | NM_001170853       | 17230067     | 61             | 36.4      | -0.74                              | 53.4       | -0.19                               |
| Mir1981       | NR_035502          | 17230750     | 65.2           | 39.2      | -0.73                              | 57.5       | -0.18                               |
| Epm2a         | ENSMUST00000069106 | 17231669     | 52.9           | 32        | -0.73                              | 49.7       | -0.09                               |
| Vnn3          | NM_011979          | 17232152     | 102.3          | 69.5      | -0.56                              | 97.4       | -0.07                               |
| Echdc1        | NM_025855          | 17232426     | 429.7          | 294.1     | -0.55                              | 404.4      | -0.09                               |
| Rtn4ip1       | NM_130892          | 17233039     | 60.8           | 42        | -0.53                              | 57.3       | -0.08                               |
| Gnptab        | NM_001004164       | 17236339     | 296.6          | 208.1     | -0.51                              | 269.2      | -0.14                               |
| G630090E17Rik | NM_001173500       | 17240303     | 34             | 22.9      | -0.57                              | 34.1       | 0                                   |
| Prdm1         | NM_007548          | 17240645     | 37.5           | 26        | -0.53                              | 49         | 0.39                                |
| Slc16a7       | ENSMUST00000063318 | 17245648     | 150.5          | 98        | -0.62                              | 237.8      | 0.66                                |
| B430319H21Rik | AK021026           | 17250849     | 60.9           | 27.5      | -1.15                              | 61         | 0                                   |
| Fgf11         | ENSMUST00000102585 | 17264960     | 52.5           | 31.3      | -0.75                              | 46.7       | -0.17                               |
| Slc2a4        | NM_009204          | 17265096     | 390.6          | 224.6     | -0.8                               | 417.9      | 0.1                                 |
| Inca1         | NM_001252485       | 17265365     | 112            | 73.4      | -0.61                              | 123.1      | 0.14                                |
| Pctp          | ENSMUST00000020864 | 17267685     | 63             | 42.6      | -0.57                              | 56.6       | -0.15                               |
| C630004H02Rik | NM_175454          | 17271861     | 60.5           | 40.8      | -0.57                              | 53.4       | -0.18                               |
| Hpcal1        | NM_016677          | 17274310     | 106.6          | 72.2      | -0.56                              | 104.5      | -0.03                               |
| Gm5784        | AK149188           | 17274369     | 69.6           | 45.5      | -0.61                              | 74.2       | 0.09                                |
| Ap4s1         | NM_021710          | 17275392     | 57             | 39.2      | -0.54                              | 49.9       | -0.19                               |
| Fam84a        | NM_029007          | 17280041     | 36.1           | 23.3      | -0.63                              | 34.5       | -0.07                               |
| Ifi2712a      | NM_029803          | 17283549     | 1669.5         | 952.3     | -0.81                              | 2138.6     | 0.36                                |
| Igh-VJ558     | BC031703           | 17284314     | 101.6          | 69        | -0.56                              | 122.3      | 0.27                                |
| Ighm          | AB067787           | 17284360     | 1162.6         | 684.2     | -0.76                              | 1463.2     | 0.33                                |
| Ighv1-53      | AB069917           | 17284577     | 79.5           | 35.4      | -1.17                              | 82.3       | 0.05                                |
| Zfp493        | NM_028402          | 17288338     | 33.7           | 23        | -0.55                              | 32.6       | -0.05                               |
| Mblac2        | NM_028372          | 17288903     | 124.4          | 83.6      | -0.57                              | 108.7      | -0.19                               |
| Ankra2        | NM_023472          | 17289396     | 45             | 31.8      | -0.5                               | 47.7       | 0.08                                |
| Aldh5a1       | NM_172532          | 17291361     | 121.7          | 76        | -0.68                              | 117.5      | -0.05                               |
| Rpp40         | ENSMUST00000171686 | 17291854     | 50.5           | 35.2      | -0.52                              | 50.6       | 0                                   |
| Muted         | NM_139063          | 17291953     | 64.9           | 43.7      | -0.57                              | 57.6       | -0.17                               |
| Dtnbp1        | NM_025772          | 17292157     | 265            | 172       | -0.62                              | 253.5      | -0.06                               |
| Fgf10         | NM_008002          | 17296483     | 165.7          | 101.3     | -0.71                              | 145.8      | -0.19                               |
| Ero1l         | NM_015774          | 17299196     | 56.6           | 35.3      | -0.68                              | 51.1       | -0.15                               |
| Trav9d-3      | X01134             | 17300247     | 77.9           | 48.7      | -0.68                              | 120.2      | 0.63                                |
| Fhit          | ENSMUST00000160340 | 17303474     | 41.1           | 28.1      | -0.55                              | 39.6       | -0.05                               |
| Efs           | NM_010112          | 17306524     | 41.8           | 25.4      | -0.72                              | 46.2       | 0.14                                |
| Prlr          | NM_011169          | 17310259     | 60.9           | 34.1      | -0.84                              | 74.9       | 0.3                                 |
| Cmb1          | NM_181588          | 17310816     | 599.8          | 374.3     | -0.68                              | 571.2      | -0.07                               |
| 4930572J05Rik | NM_198607          | 17312191     | 62.3           | 41.3      | -0.59                              | 57.1       | -0.13                               |
| Gcat          | NM_013847          | 17312884     | 34.1           | 21        | -0.7                               | 36         | 0.08                                |
| 9330020H09Rik | NR_028442          | 17314626     | 32.6           | 19.6      | -0.74                              | 28.9       | -0.17                               |
| Hoxc4         | NM_013553          | 17315538     | 45.7           | 32.3      | -0.5                               | 47.5       | 0.06                                |
| Angpt1        | ENSMUST00000022921 | 17316780     | 216.6          | 124.9     | -0.79                              | 227.6      | 0.07                                |
| Oplah         | ENSMUST00000171340 | 17318428     | 252.5          | 174.8     | -0.53                              | 244.9      | -0.04                               |
| Tst           | NM_009437          | 17318983     | 313.3          | 185.8     | -0.75                              | 313.9      | 0                                   |
| Prodh         | ENSMUST00000003620 | 17328842     | 107.3          | 71.6      | -0.58                              | 125.1      | 0.22                                |
| Iglv1         | M94350             | 17329023     | 107.7          | 17        | -2.66                              | 269.2      | 1.32                                |
| Gm15760       | NR_030670          | 17329149     | 65.2           | 43.3      | -0.59                              | 65.7       | 0.01                                |
| Ehhadh        | NM_023737          | 17329220     | 216            | 122.3     | -0.82                              | 209.2      | -0.05                               |
| Cyp4f17       | NM_001101445       | 17335952     | 213.5          | 121.5     | -0.81                              | 235        | 0.14                                |
| Cipp          | NM_017393          | 17338925     | 171.9          | 116.7     | -0.56                              | 172        | 0                                   |
| Mir219-1      | NR_029800          | 17343733     | 36.1           | 23.2      | -0.64                              | 31.5       | -0.2                                |
| LOC100862363  | XR_141834          | 17345004     | 33.6           | 22.9      | -0.55                              | 39         | 0.21                                |
| Lrg1          | NM_029796          | 17346150     | 738.9          | 474.5     | -0.64                              | 681        | -0.12                               |
| Mapre2        | NM_001162941       | 17348933     | 143.4          | 98.3      | -0.55                              | 126.2      | -0.18                               |
| Gm4013        | NR_033452          | 17354071     | 203            | 138.9     | -0.55                              | 187.6      | -0.11                               |
| Fibp          | NM_001253832       | 17356434     | 156.4          | 110.5     | -0.5                               | 137.6      | -0.18                               |
| Cd274         | NM_021893          | 17358544     | 138.7          | 90.5      | -0.62                              | 168.9      | 0.28                                |
| O3far1        | NM_181748          | 17359113     | 101.3          | 69.7      | -0.54                              | 97.2       | -0.06                               |
| Gpam          | ENSMUST00000086868 | 17365728     | 1674.5         | 1045.1    | -0.68                              | 1663.3     | -0.01                               |
| Ivd           | ENSMUST00000028807 | 17374648     | 537            | 354.5     | -0.6                               | 483.6      | -0.15                               |
| Bcl2l11       | NM_207680          | 17375961     | 46.9           | 30.7      | -0.61                              | 45.3       | -0.05                               |
| Pygb          | ENSMUST00000045441 | 17377498     | 846.2          | 591.5     | -0.52                              | 830.3      | -0.03                               |

**Table S2-continued**

| Gene symbol   | Gene accession     | Probe set ID | Control signal | KO signal | Log <sub>2</sub> (KO/control) | DKO signal | Log <sub>2</sub> (DKO/control) |
|---------------|--------------------|--------------|----------------|-----------|-------------------------------|------------|--------------------------------|
| Rbm38         | ENSMUST00000173393 | 17380199     | 103.1          | 71.6      | -0.53                         | 94.7       | -0.12                          |
| Gm14391       | ENSMUST00000151240 | 17380529     | 168.2          | 97.7      | -0.78                         | 191.3      | 0.19                           |
| Hnmt          | NM_080462          | 17382203     | 329.5          | 222.5     | -0.57                         | 327.4      | -0.01                          |
| Olf1226       | NM_146967          | 17387912     | 36.1           | 23.2      | -0.64                         | 41.3       | 0.19                           |
| Tmem154       | NM_177260          | 17398571     | 72.8           | 50.8      | -0.52                         | 69.6       | -0.07                          |
| Gbp3          | ENSMUST00000029935 | 17403237     | 85.6           | 46.9      | -0.87                         | 74.9       | -0.19                          |
| Bche          | NM_009738          | 17405908     | 334.2          | 210       | -0.67                         | 298.7      | -0.16                          |
| Dcst1         | NM_029974          | 17407049     | 53.5           | 37.6      | -0.51                         | 48.8       | -0.13                          |
| Rbm12b        | NM_028226          | 17411892     | 42.8           | 18.9      | -1.18                         | 41.7       | -0.04                          |
| Tmem38b       | NM_028053          | 17414250     | 54.4           | 37.1      | -0.55                         | 50.1       | -0.12                          |
| Gm12824       | NM_001085549       | 17417090     | 228.3          | 150.8     | -0.6                          | 229.3      | 0.01                           |
| Mycbp         | ENSMUST00000030400 | 17418241     | 263.8          | 180.1     | -0.55                         | 239.8      | -0.14                          |
| Mecr          | NM_025297          | 17419332     | 85.3           | 57.5      | -0.57                         | 77.1       | -0.15                          |
| Hnrph2        | NM_019868          | 17421170     | 49.2           | 34.7      | -0.5                          | 43.9       | -0.17                          |
| Gm13152       | ENSMUST00000063704 | 17421491     | 32.2           | 18        | -0.84                         | 28.1       | -0.2                           |
| 2810432D09Rik | NM_027278          | 17424293     | 53.2           | 35.7      | -0.57                         | 52.8       | -0.01                          |
| Gm568         | BC028561           | 17425120     | 49             | 31.9      | -0.62                         | 43.8       | -0.16                          |
| Bnc2          | NM_172870          | 17426929     | 339.5          | 211       | -0.69                         | 327.7      | -0.05                          |
| Gm12597       | NM_206870          | 17427067     | 33.6           | 23.8      | -0.5                          | 33.3       | -0.01                          |
| Cdkn2a        | NM_009877          | 17427147     | 41.4           | 27.3      | -0.6                          | 36.9       | -0.16                          |
| Cdkn2c        | NM_007671          | 17428217     | 266.3          | 143.9     | -0.89                         | 284.6      | 0.1                            |
| Zbtb48        | NM_133879          | 17433412     | 49.8           | 33.1      | -0.59                         | 49.3       | -0.02                          |
| Ras111b       | NM_026878          | 17438189     | 68.7           | 38.8      | -0.82                         | 61.3       | -0.16                          |
| Igj           | NM_152839          | 17449447     | 34.7           | 17.2      | -1.02                         | 63.9       | 0.88                           |
| Cdkl2         | ENSMUST00000086978 | 17449609     | 50.7           | 34.4      | -0.56                         | 47.5       | -0.1                           |
| Agpat9        | ENSMUST00000092990 | 17450196     | 149.9          | 83.7      | -0.84                         | 167        | 0.16                           |
| AB010352      | AB010352           | 17450950     | 41.8           | 28.6      | -0.55                         | 46.1       | 0.14                           |
| Try4          | NM_011646          | 17457731     | 63.8           | 41.6      | -0.62                         | 58.2       | -0.13                          |
| Plekha8       | NM_001164361       | 17458734     | 49.2           | 32        | -0.62                         | 44.5       | -0.14                          |
| Retsat        | ENSMUST00000070597 | 17459676     | 416.5          | 255.2     | -0.71                         | 399        | -0.06                          |
| Asns          | ENSMUST00000031766 | 17464718     | 317.5          | 214.4     | -0.57                         | 331.2      | 0.06                           |
| Igkw4-91      | X88903             | 17467398     | 69.8           | 36.9      | -0.92                         | 78.7       | 0.17                           |
| Elmod3        | NM_144917          | 17467782     | 322.2          | 197.4     | -0.71                         | 291.9      | -0.14                          |
| Wbp1          | ENSMUST00000032111 | 17468102     | 204.9          | 136.4     | -0.59                         | 186        | -0.14                          |
| Gys2          | NM_145572          | 17472497     | 81.6           | 51.4      | -0.67                         | 74.8       | -0.13                          |
| Bhlhe41       | ENSMUST00000032386 | 17472760     | 82             | 57.5      | -0.51                         | 89         | 0.12                           |
| Isoc2a        | NM_001101598       | 17473402     | 106.9          | 65.6      | -0.7                          | 95.1       | -0.17                          |
| Zfp28         | NM_175247          | 17473603     | 48.7           | 32.3      | -0.59                         | 42.6       | -0.19                          |
| Ptgir         | NM_008967          | 17474217     | 33.5           | 21.9      | -0.61                         | 37.9       | 0.18                           |
| Il28b         | NM_177396          | 17475863     | 42             | 28.2      | -0.58                         | 38.4       | -0.13                          |
| Dbp           | ENSMUST00000080885 | 17477979     | 733.9          | 483.8     | -0.6                          | 801.4      | 0.13                           |
| Sez6l2        | ENSMUST00000123117 | 17483192     | 48.4           | 26.7      | -0.86                         | 45.2       | -0.1                           |
| Hcst          | NM_011827          | 17489046     | 36.4           | 22.7      | -0.68                         | 37.8       | 0.06                           |
| Cpeb1         | NM_001252525       | 17492754     | 106.7          | 75        | -0.51                         | 94.9       | -0.17                          |
| Hbb-b1        | NM_008220          | 17494221     | 200            | 123.7     | -0.69                         | 227.9      | 0.19                           |
| Coro1a        | ENSMUST00000106364 | 17496376     | 63.7           | 39.9      | -0.68                         | 61.5       | -0.05                          |
| Fadd          | ENSMUST00000033394 | 17498461     | 63             | 43.1      | -0.55                         | 55.4       | -0.18                          |
| Gm15315       | NM_001177528       | 17499796     | 81.6           | 50.4      | -0.69                         | 77.1       | -0.08                          |
| Car7          | NM_053070          | 17504454     | 55.1           | 38.5      | -0.52                         | 49.4       | -0.16                          |
| Cog4          | NM_133973          | 17505648     | 483.9          | 322.6     | -0.59                         | 482.5      | 0                              |
| Ednra         | NM_010332          | 17510685     | 552.5          | 354.4     | -0.64                         | 500.1      | -0.14                          |
| Ces1f         | NM_144930          | 17511731     | 502.2          | 216.7     | -1.21                         | 533.2      | 0.09                           |
| Ddx28         | NM_028038          | 17512630     | 35.8           | 25        | -0.52                         | 34.8       | -0.04                          |
| Ldhd          | NM_027570          | 17513135     | 185            | 120.8     | -0.61                         | 180.8      | -0.03                          |
| Gm6484        | NM_001080940       | 17515335     | 122.1          | 84.6      | -0.53                         | 123.1      | 0.01                           |
| 2310047B19Rik | NM_025870          | 17515371     | 47.3           | 32.9      | -0.52                         | 56.2       | 0.25                           |
| Opcml         | ENSMUST00000115243 | 17515653     | 33.4           | 22.8      | -0.55                         | 33.2       | -0.01                          |
| 9030425E11Rik | ENSMUST00000034522 | 17516352     | 416.9          | 286.6     | -0.54                         | 452.2      | 0.12                           |
| C920006O11Rik | NR_040401          | 17519644     | 43.3           | 26.1      | -0.73                         | 42.5       | -0.03                          |
| Cish          | ENSMUST00000085102 | 17521300     | 49.5           | 24.9      | -0.99                         | 47.4       | -0.06                          |
| Muc16         | AK003577           | 17524311     | 42             | 23.6      | -0.83                         | 39.3       | -0.1                           |
| Anln          | NM_028390          | 17524969     | 75.3           | 50.7      | -0.57                         | 66.8       | -0.17                          |
| Rbm15b        | NM_175402          | 17530802     | 43.4           | 29.4      | -0.56                         | 38.1       | -0.19                          |
| Gm19971       | XR_106302          | 17533823     | 62.7           | 44        | -0.51                         | 67.5       | 0.11                           |
| Plxna3        | NM_008883          | 17535841     | 31.7           | 22.3      | -0.5                          | 32.1       | 0.02                           |
| C1galt1c1     | NM_021550          | 17541217     | 56.2           | 39.5      | -0.51                         | 56.6       | 0.01                           |
| 2310047B19Rik | NM_025870          | 17548156     | 84.4           | 55.2      | -0.61                         | 81.3       | -0.06                          |
| 4930412F12Rik | AK015120           | 17548675     | 42.8           | 27.6      | -0.64                         | 42.4       | -0.02                          |
| Gm6625        | XM_003085369       | 17548690     | 298.4          | 210.4     | -0.5                          | 328.2      | 0.14                           |



**Table S3.** List of lipid mediators detectable by LC-MS/MS–based metabololipidomics.

| Arachidonic acid-origin          |                                  |                     |                  |
|----------------------------------|----------------------------------|---------------------|------------------|
| Prostanoids                      | Leukotrienes                     | Lipoxins            | Pathway markers  |
| PGE <sub>2</sub>                 | LTB <sub>4</sub>                 | LXA <sub>4</sub>    | 5-HETE           |
| PGD <sub>2</sub>                 | Δ6-trans-LTB <sub>4</sub>        | LXB <sub>4</sub>    | 12-HETE          |
| PGF <sub>2α</sub>                | 12-epi-Δ6-trans-LTB <sub>4</sub> | 5,15-diHETE         | 15-HETE          |
| 8-iso-PGF <sub>2α</sub>          | 5,12-diHETE                      | AT-LXA <sub>4</sub> | Arachidonic acid |
| 6-keto-PGI <sub>2</sub>          | 5,6-diHETE                       | AT-LXB <sub>4</sub> |                  |
| PGJ <sub>2</sub>                 | 20-OH-LTB <sub>4</sub>           |                     |                  |
| Δ12-PGJ <sub>2</sub>             | 20-COOH-LTB <sub>4</sub>         |                     |                  |
| 15-deoxy-Δ12,14-PGJ <sub>2</sub> | LTC <sub>4</sub>                 |                     |                  |
| TxB <sub>2</sub>                 | LTD <sub>4</sub>                 |                     |                  |
|                                  | LTE <sub>4</sub>                 |                     |                  |

| DHA-origin         |                      |                      |                 |
|--------------------|----------------------|----------------------|-----------------|
| D-series resolvins | Protectin            | Maresin              | Pathway markers |
| RvD1               | PD1                  | MaR1                 | 4-HDHA          |
| RvD2               | AT-PD1               | Δ12-trans-MaR1       | 7-HDHA          |
| RvD3               | Δ15-trans-PD1        | 7-epi-Δ12-trans-MaR1 | 14-HDHA         |
| RvD4               | 10-epi-Δ15-trans-PD1 | 4,14-diHDHA          | 17-HDHA         |
| RvD5               | 10,17-diHDHA         | 7,14-diHDHA          | DHA             |
| RvD6               |                      | 13,14-diHDHA         |                 |
| AT-RvD1            |                      |                      |                 |
| AT-RvD2            |                      |                      |                 |
| AT-RvD3            |                      |                      |                 |
| AT-RvD4            |                      |                      |                 |
| AT-RvD5            |                      |                      |                 |

| EPA-origin        |                  |                  |                    |                 |
|-------------------|------------------|------------------|--------------------|-----------------|
| Prostanoids       | Leukotrienes     | Lipoxins         | E-series resolvins | Pathway markers |
| PGE <sub>3</sub>  | LTB <sub>5</sub> | LXA <sub>5</sub> | RvE1               | 5-HEPE          |
| PGD <sub>3</sub>  | LTC <sub>5</sub> | LXB <sub>5</sub> | RvE2               | 12-HEPE         |
| PGF <sub>3α</sub> | LTD <sub>5</sub> | 5,15-diHEPE      | RvE3               | 15-HEPE         |
| TxB <sub>3</sub>  | LTE <sub>5</sub> |                  |                    | 18-HEPE         |
|                   |                  |                  |                    | EPA             |
